# Supplementary material for: Assessment of the Potential of CDK2 Inhibitor NU6140 to Influence the Expression of Pluripotency Markers NANOG, OCT4, and SOX2 in 2102Ep and H9 Cells
Source: Hindawi journal article supplement (doi:10.1155/2014/280638), 2014-01-01

**A**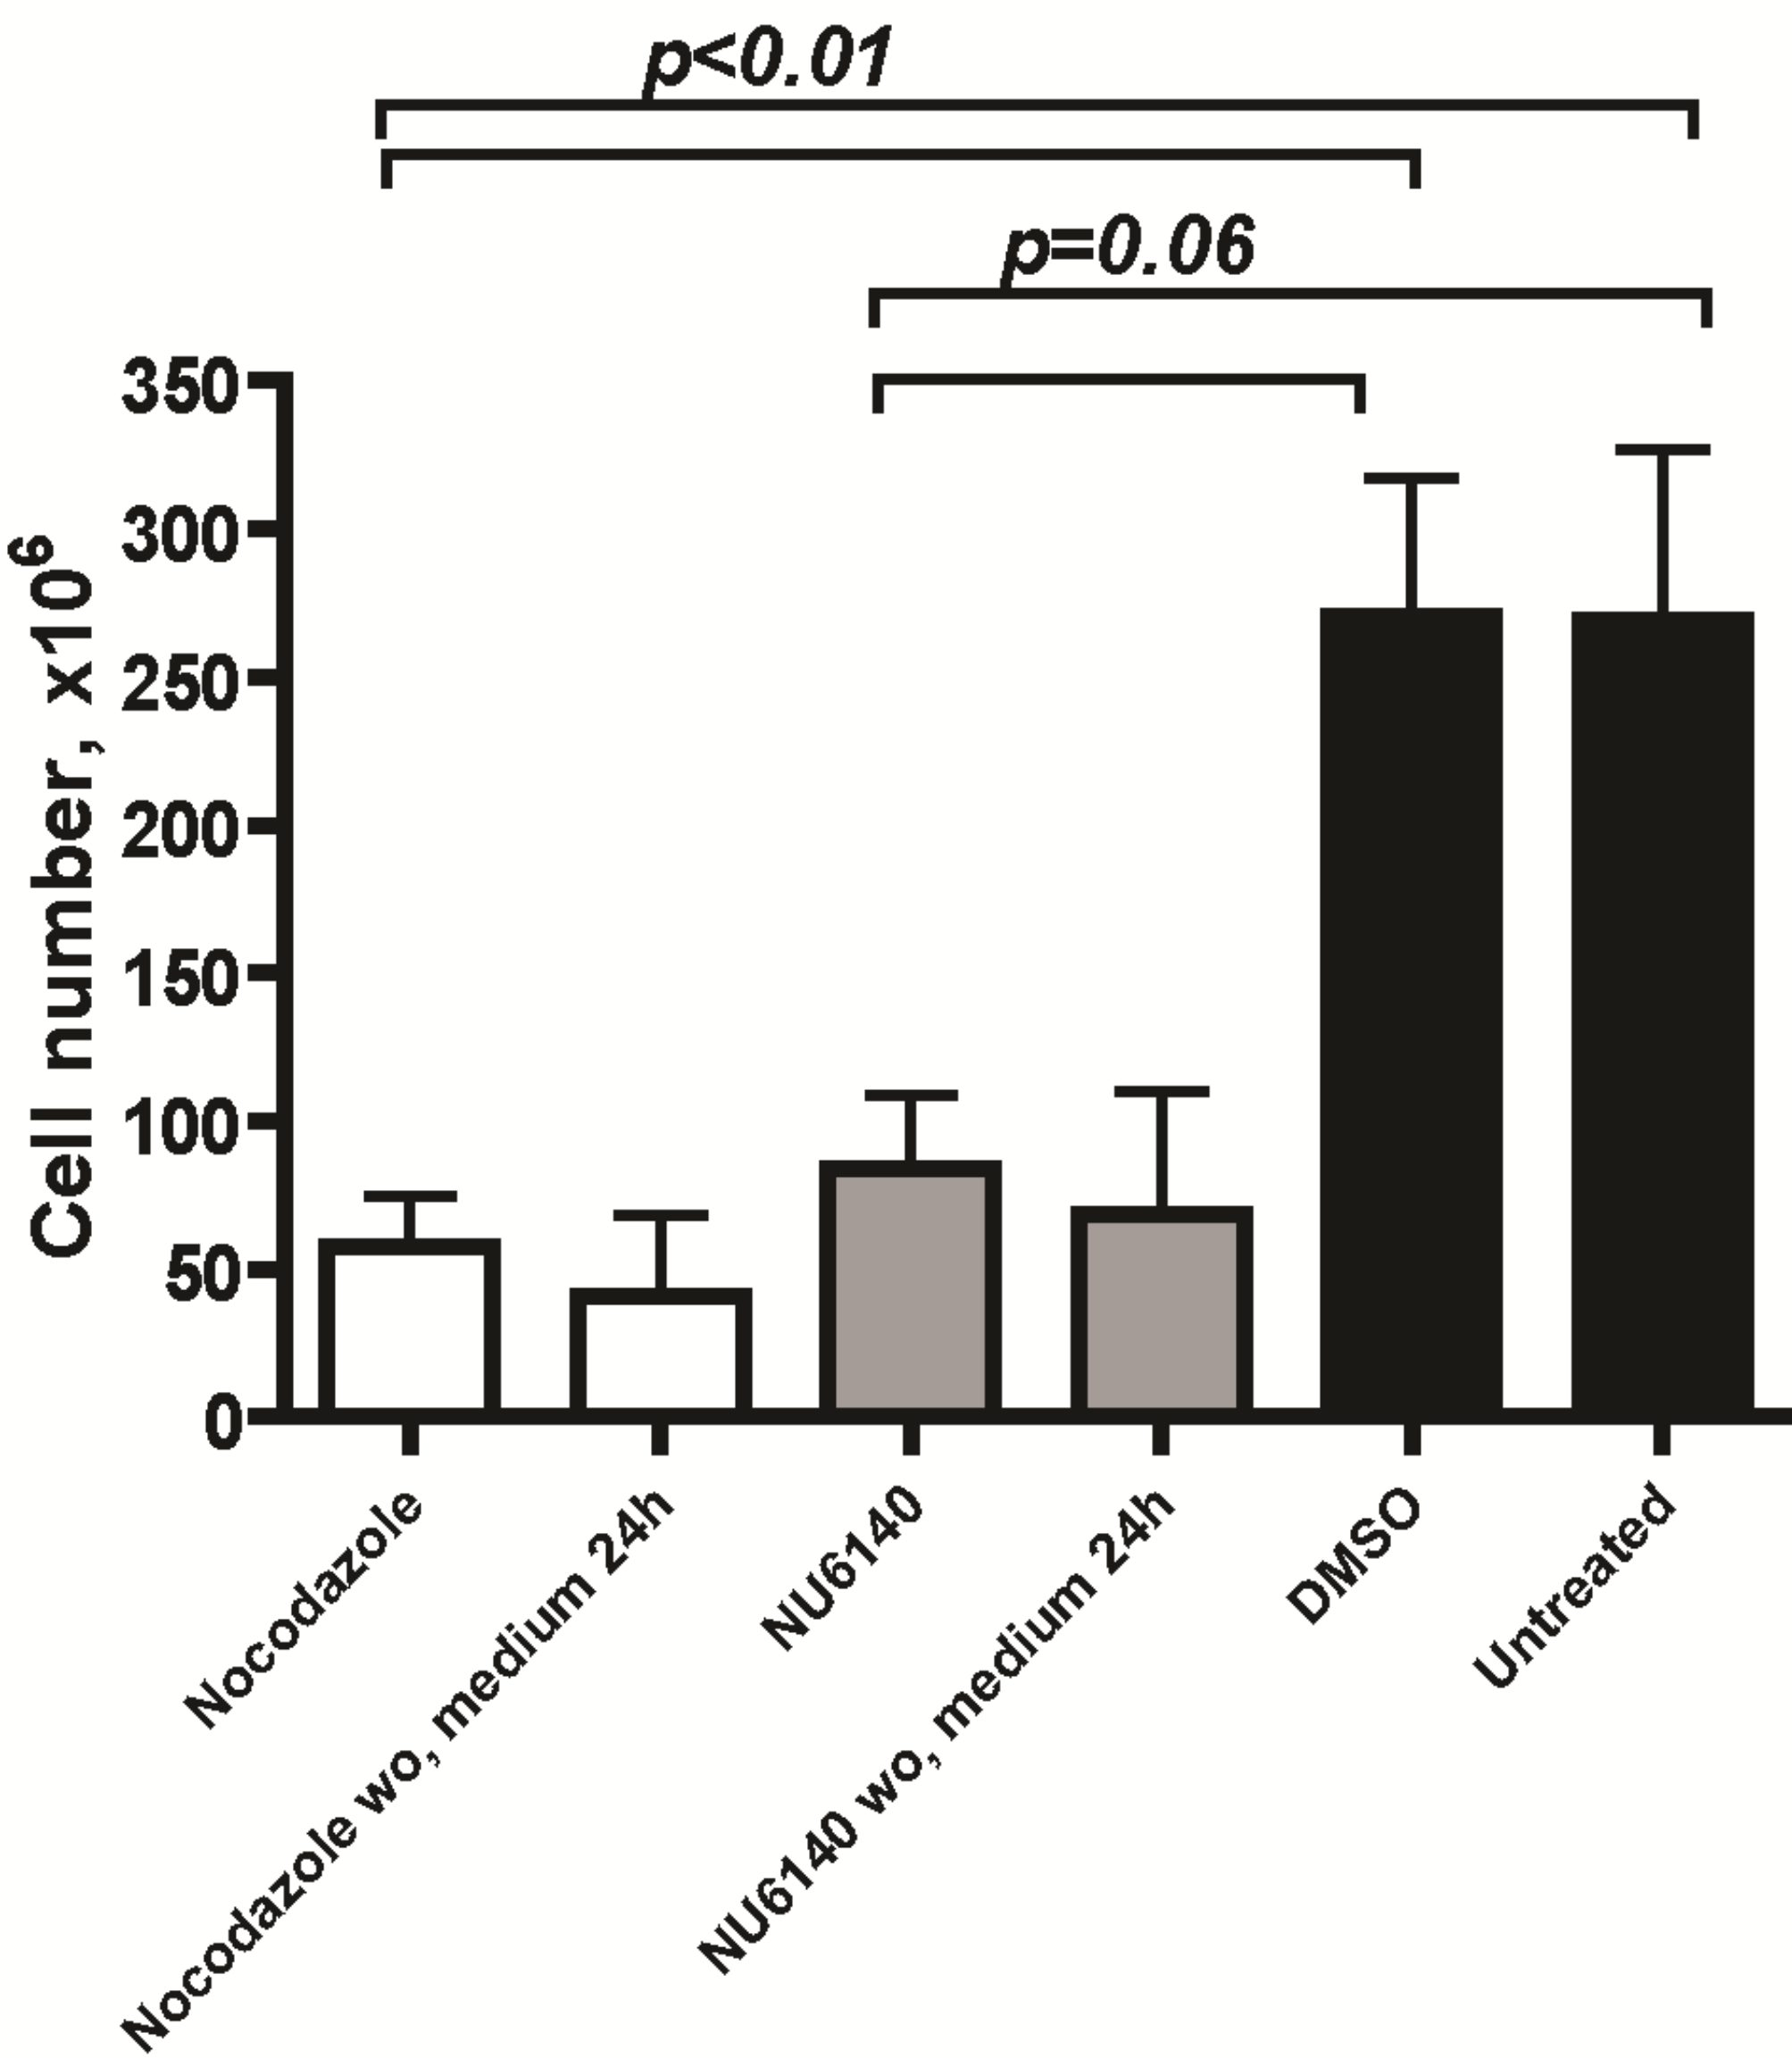**B**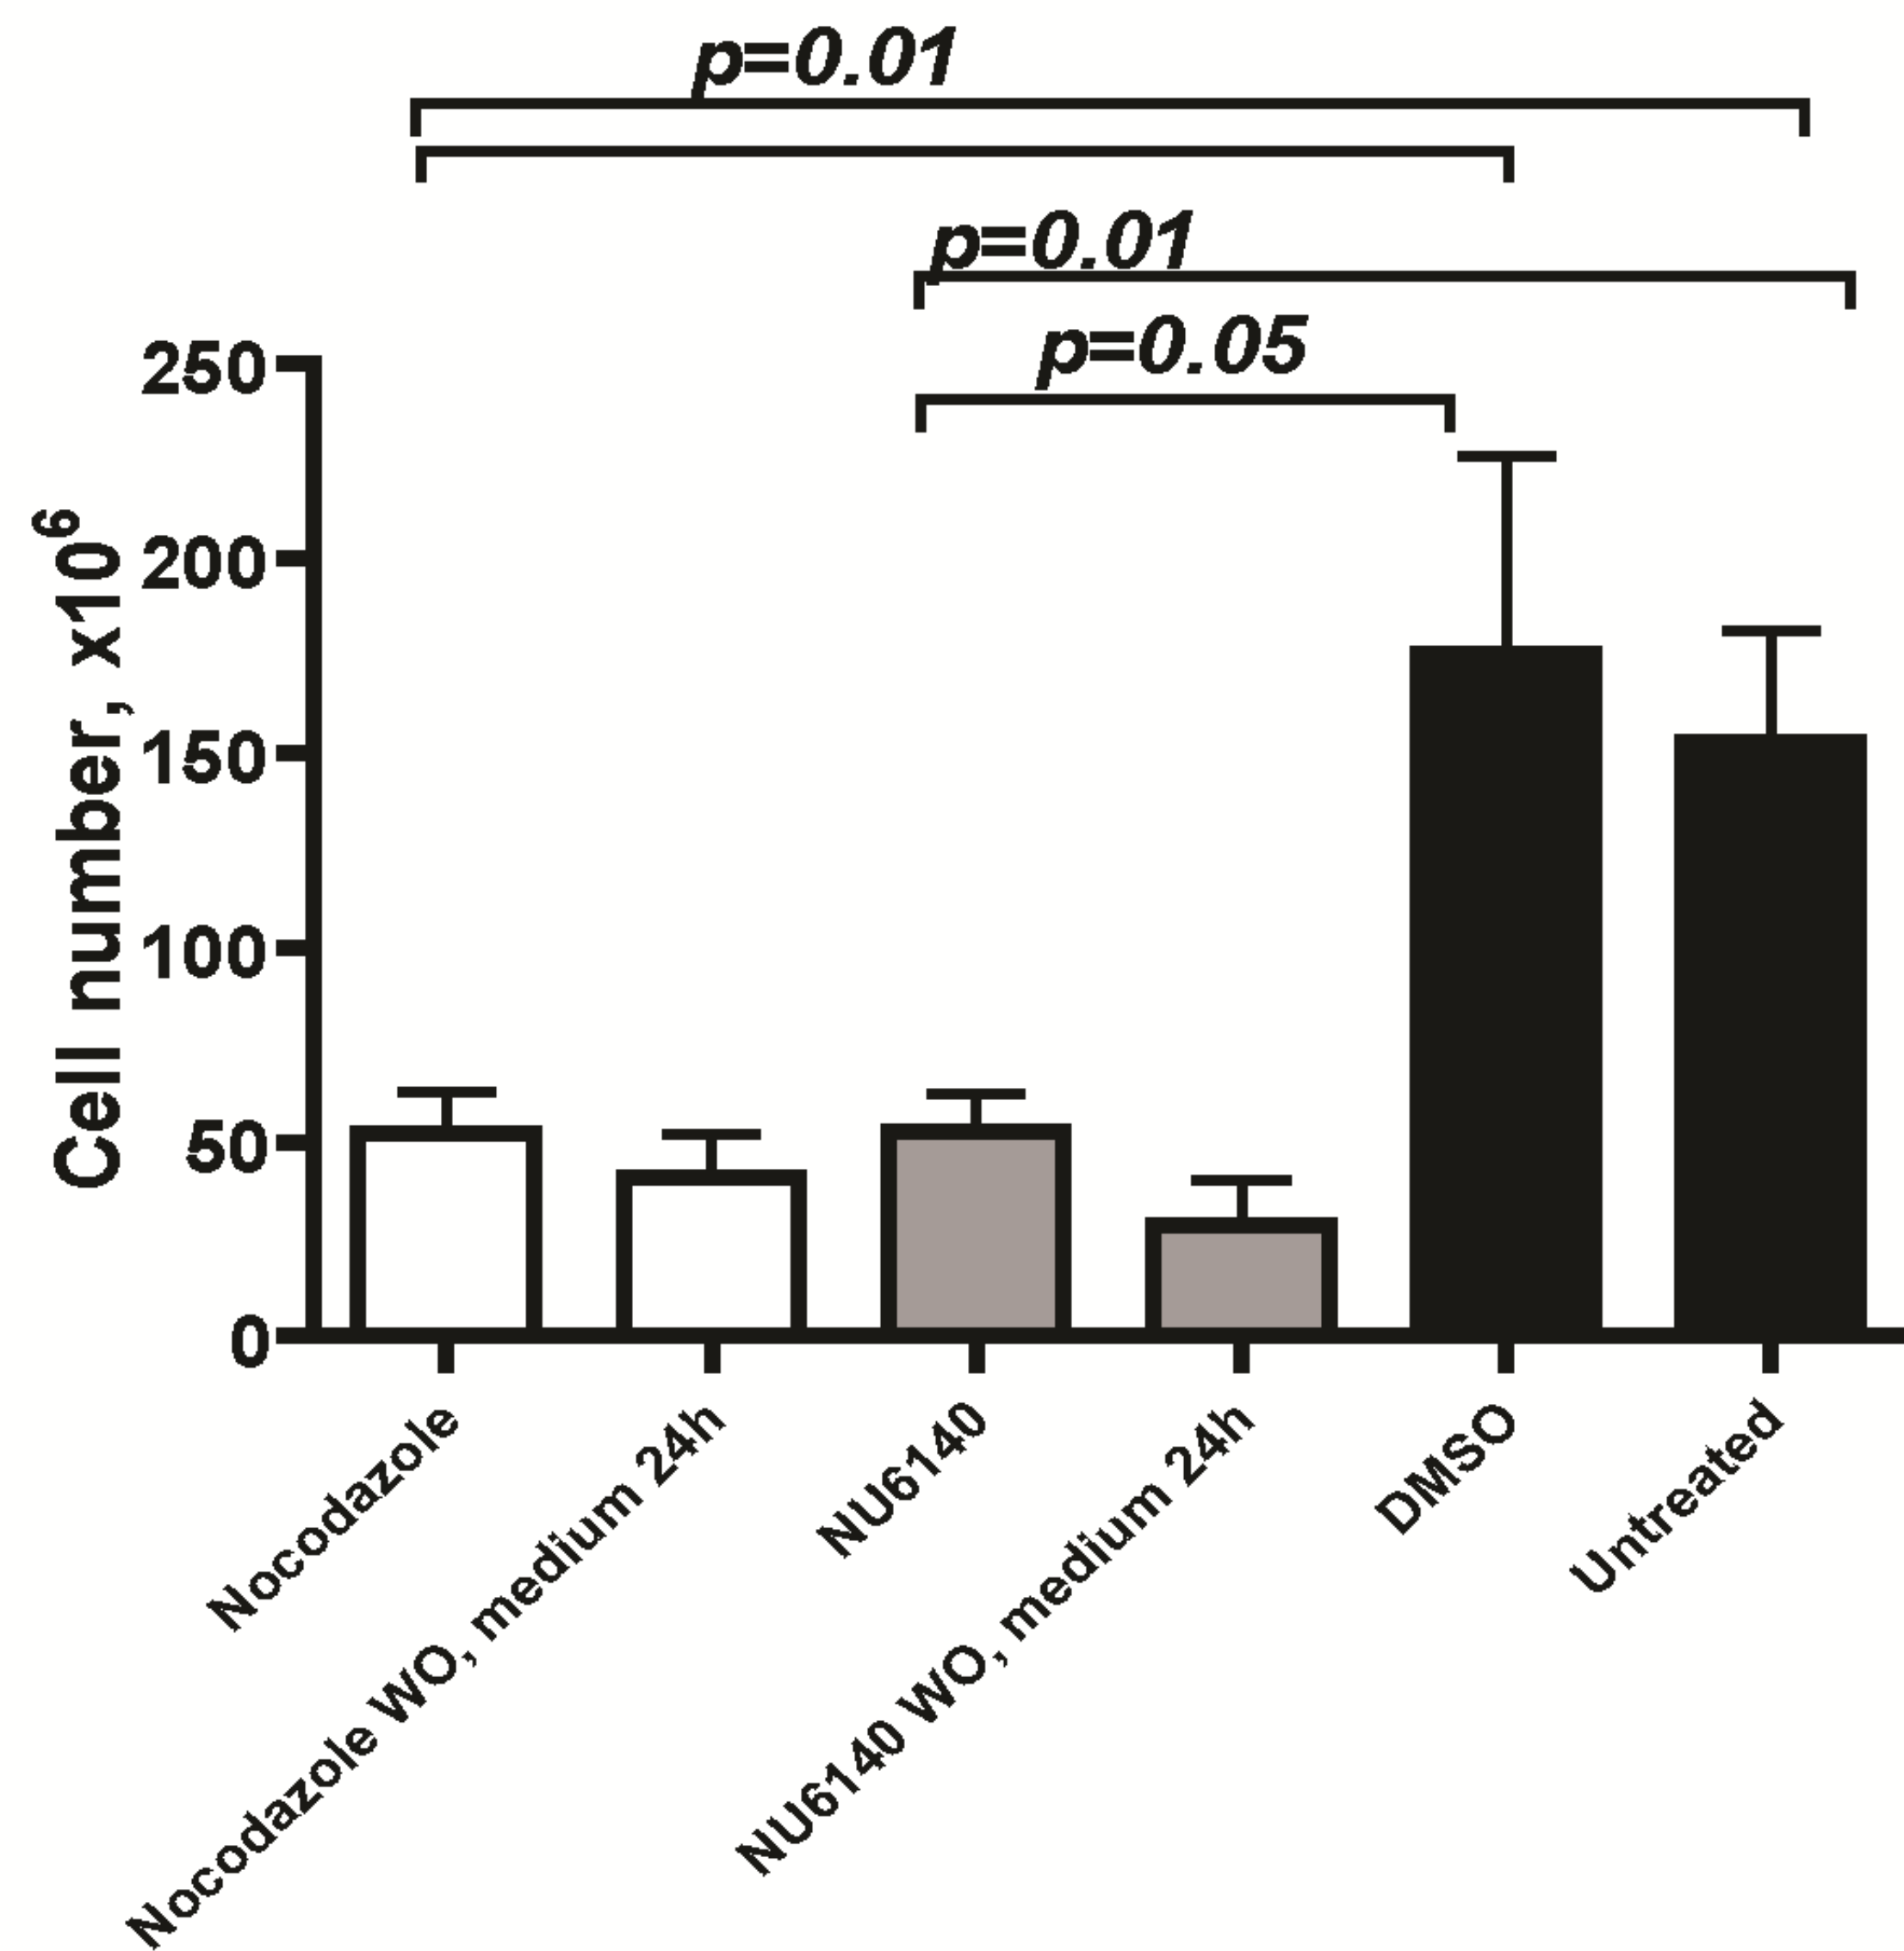**C**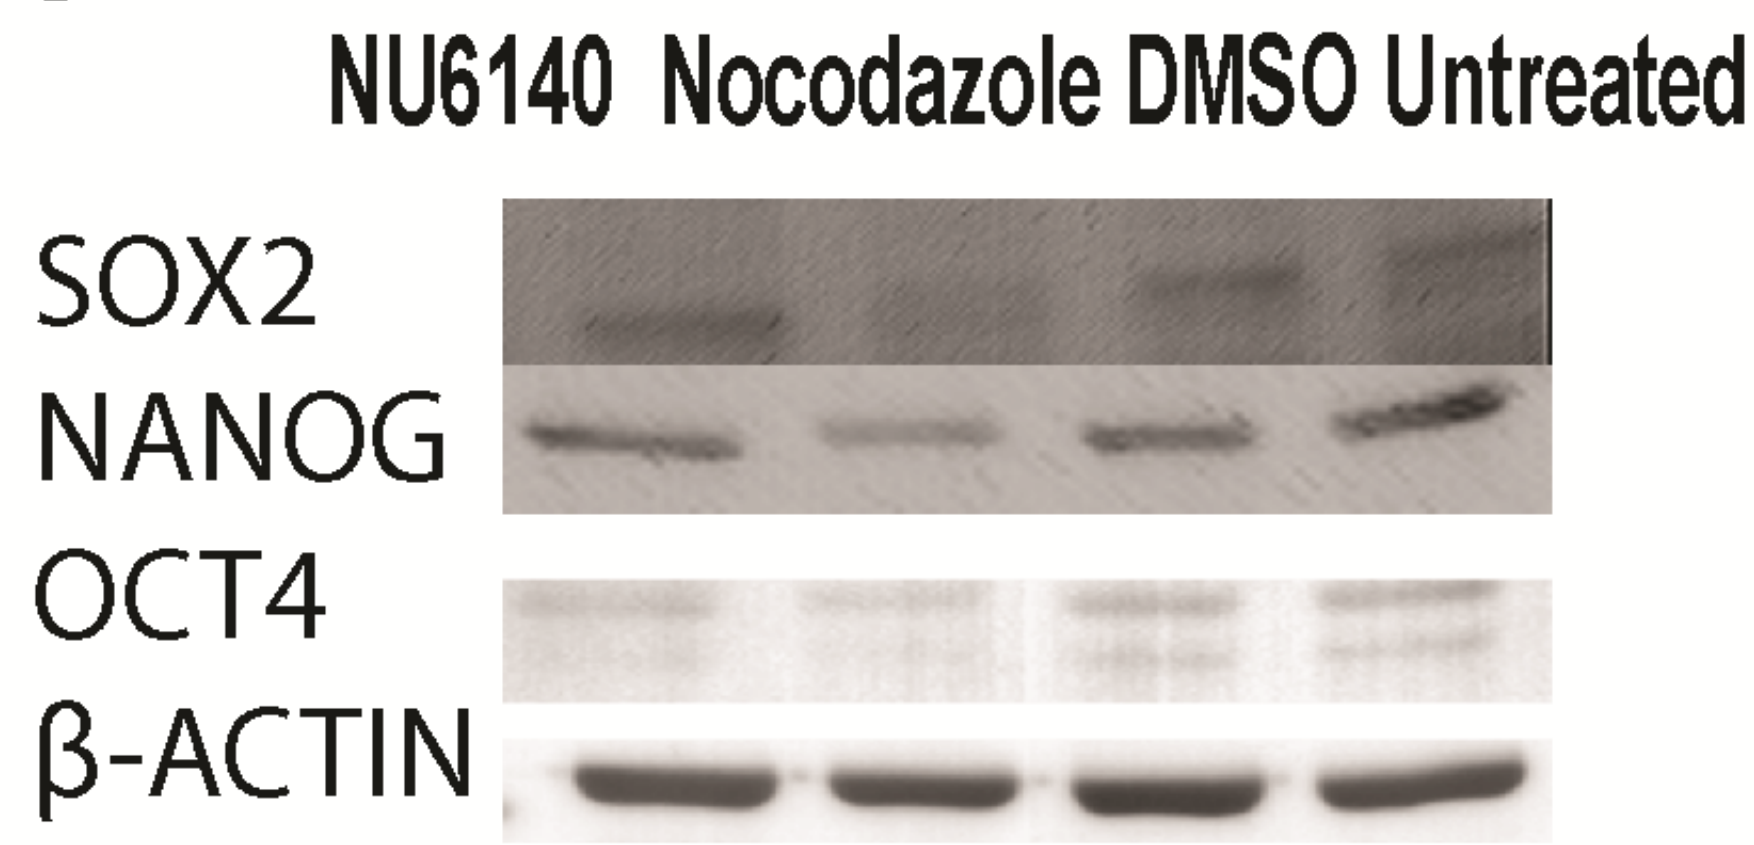**D**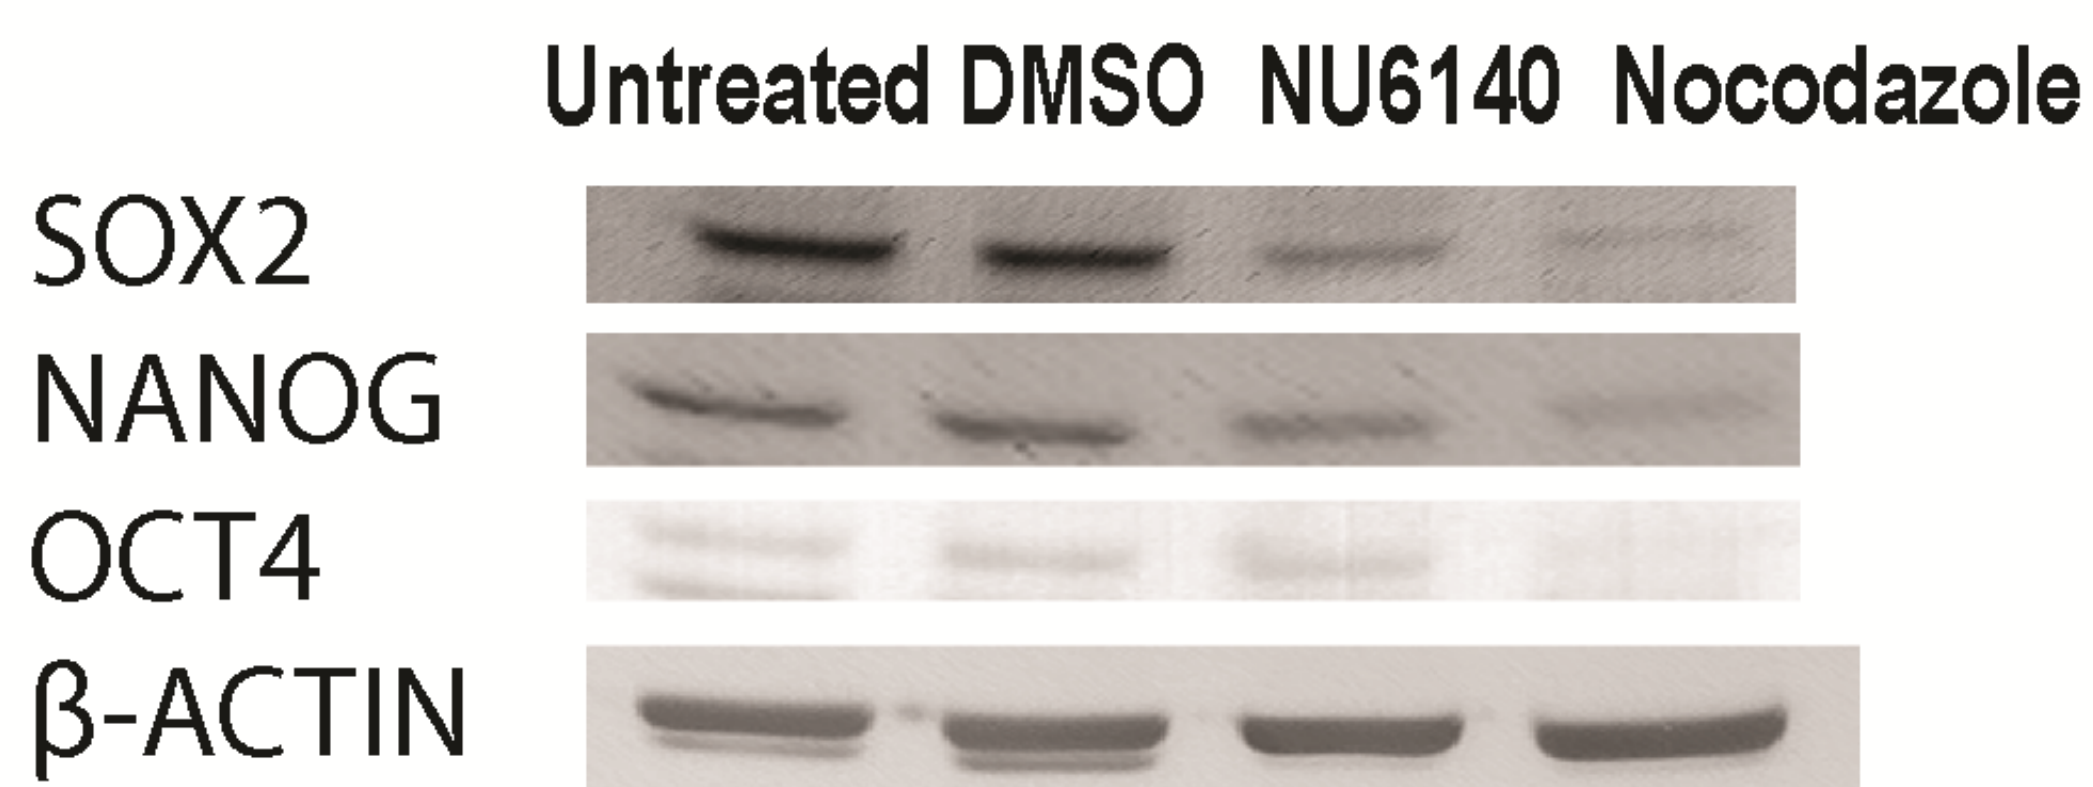

Supplement: f1 [file 280638.f1.pdf]
